# Supplementary material for: Daytime Dependence of the Activity of the Rat Brain Pyruvate Dehydrogenase Corresponds to the Mitochondrial Sirtuin 3 Level and Acetylation of Brain Proteins, All Regulated by Thiamine Administration Decreasing Phosphorylation of PDHA Ser293
Source: MDPI journal article supplement (doi:10.3390/ijms22158006), 2021-07-27
Supplement: s1 [file s1]

# Daytime dependence of the activity of the rat brain pyruvate dehydrogenase corresponds to the mitochondrial sirtuin 3 level and acetylation of brain proteins, all regulated by thiamine administration decreasing phosphorylation of PDHA Ser293

Vasily A. Aleshin <sup>1,2</sup>, Artem V. Artiukhov <sup>1,2</sup>, Thilo Kaehne <sup>3</sup>, Anastasia V. Graf <sup>1,4,5</sup>, Victoria I. Bunik <sup>1,2,6,\*</sup>

<sup>1</sup> A.N. Belozersky Institute of Physicochemical Biology, Lomonosov Moscow State University, 119991 Moscow, Russia

<sup>2</sup> Faculty of Bioengineering and Bioinformatics, Lomonosov Moscow State University, 119991 Moscow, Russia

<sup>3</sup> Institute of Experimental Internal Medicine, Otto-von-Guericke University, Magdeburg, Germany

<sup>4</sup> Faculty of Nano-, Bio-, Informational, Cognitive and Socio-humanistic Sciences and Technologies at Moscow Institute of Physics and Technology, Maximova Street 4, 123098

<sup>5</sup> Faculty of Biology, Lomonosov Moscow State University, 119234 Moscow, Russia

<sup>6</sup> Department of Biochemistry, Sechenov University, Trubetskaya, 8, bld. 2, 119991 Moscow, Russia;

\* Correspondence: bunik@belozersky.msu.ru (V.I.B.)

## Supplementary Materials

**Supplementary Table S1.** The peptides (up to four per protein, marked as p1-p4), used for the relative quantification by MS and the forms of acetylatable peptides or the PDHA1-Ser293-containing peptide with/without phosphorylation are summarized in this table. Dependent on the number of the lysine, arginine and histidine residues in a peptide, several charged precursor variants (2+, 3+ or 4+) with monoisotopic precursor mass and the C13-isotopomeric variants ([M+1] and [M+2]) have been detected to increase the quantification accuracy. ox – Met oxidation (+16), cam – Cys carbamidomethylation (+57), da – Asn deamidation (+1), ph – Ser phosphorylation (+80), n.a. – not analyzed.

| Peptide                 | Specification   | C13-isotopomeric variants of the precursors |             |             |
|-------------------------|-----------------|---------------------------------------------|-------------|-------------|
|                         |                 | monoisotopic                                | [M+1]       | [M+2]       |
| VAPEEHPVLLTEAPLNPK      | ACTB p1         | 977.5358++                                  | 978.0373++  | 978.5387++  |
|                         |                 | 652.0263+++                                 | 652.3606+++ | 652.6949+++ |
| DLYANTVLSGGTTMoxYPGIADR | ACTB p2         | 1116.0361++                                 | 1116.5375++ | 1117.0386++ |
| QEYDESGPSIVHR           | ACTB p3         | 758.8550++                                  | 759.3564++  | 759.8577++  |
|                         |                 | 506.2391+++                                 | 506.5734+++ | 506.9076+++ |
| PSGNYVGDSDLQLER         | TBB3 p1         | 825.3919++                                  | 825.8934++  | 826.3947++  |
| EVDEQMoxLAIQSK          | TBB3 p2         | 703.8452++                                  | 704.3467++  | 704.8474++  |
| ISVYYNEASSHK            | TBB3 p3         | 699.3384++                                  | 699.8399++  | 700.3412++  |
| FANDATFEIK              | PDHA1 p1        | 578.2877++                                  | 578.7892++  | 579.2905++  |
|                         |                 | 466.5614+++                                 | 466.8957+++ | 467.2299+++ |
| LEEGPPVTTVLTR           | PDHA1 p2        | 706.3932++                                  | 706.8947++  | 707.3960++  |
| LPCcamIFICcamENNR       | PDHA1 p3        | 718.3447++                                  | 718.8461++  | 719.3464++  |
| YHGHSMoxSDPGVSYR        | PDHA1 Ser293    | 804.8466++                                  | 805.3480++  | 805.8489++  |
|                         |                 | 536.9002+++                                 | 537.2344+++ | 537.5683+++ |
| YHGHSpHoxSDPGVSYR       | PDHA1 Ph-Ser293 | 844.8298++                                  | 845.3312++  | n.a.        |
|                         |                 | 563.5556+++                                 | 563.8899+++ | 564.2238+++ |
| VVSPWNSEDAK             | PDHB p1         | 616.3013++                                  | 616.8028++  | 617.3041++  |
| EGIECcamEVINLR          | PDHB p2         | 666.3348++                                  | 666.8362++  | 667.3369++  |
| VTGADVPMoxPYAK          | PDHB p3         | 632.8157++                                  | 633.3172++  | 633.8179++  |

|                                          |                    |              |              |              |
|------------------------------------------|--------------------|--------------|--------------|--------------|
| ILEDNSIPQVK                              | PDHB p4            | 628.3483++   | 628.8497++   | 629.3511++   |
| AAPAAAAAAPPGPR                           | DLAT p1            | 594.8278++   | 595.3292++   | 595.8305++   |
| DIDSFVPTK                                | DLAT p2            | 511.2637++   | 511.7652++   | 512.2665++   |
| ILVPEGTR                                 | DLAT p3            | 442.7636++   | 443.2651++   | 443.7664++   |
| VFVSPLAK                                 | DLAT p4            | 430.7656++   | 431.2671++   | 431.7685++   |
| NQVTATTADGSTQVIGTK                       | DLD p1             | 896.4578++   | 896.9592++   | 897.4606++   |
| IDVSVEAASGGK                             | DLD p2             | 566.7959++   | 567.2973++   | 567.7986++   |
| ALTGGIAHLFK                              | DLD p3             | 564.3322++   | 564.8337++   | 565.3350++   |
|                                          |                    | 376.5572+++  | 376.8915+++  | n.a.         |
| VGKFPFAANSR                              | DLD p4             | 398.5524+++  | 398.8867+++  | 399.2209+++  |
| EINLLPDR                                 | PDK2 p1            | 485.2718++   | 485.7733++   | 486.2746++   |
| LPVYNK                                   | PDK2 p2            | 367.2158++   | 367.7173++   | n.a.         |
| HAVGNNEFGAVDHER                          | PDP1 p1            | 551.2572+++  | 551.5915+++  | 551.9257+++  |
| SPSTGLYANLEK                             | SIRT2 p1           | 640.3301++   | 640.8315++   | 641.3329++   |
| EHANIDAQSGSQASNPSATVSPR                  | SIRT2 p2           | 1162.5467++  | 1163.0481++  | 1163.5494++  |
|                                          |                    | 775.3669+++  | 775.7012+++  | 776.0354+++  |
| CcamYTQNIDTLER                           | SIRT2 p3           | 706.8274++   | 707.3288++   | 707.8295++   |
| VTQSNFAVGYKacTDEFQLHTN<br>VNDGTEFGGSIYQK | VDAC1<br>Ac-Lys174 | 1279.6061+++ | 279,9404+++  | 1280,2747+++ |
| VTQSNFAVGYK                              | VDAC1<br>Lys174    | 607.3142++   | 607,8157++   | 608,3170++   |
| VNNSSLIGLGYTQTLKPGIK                     | VDAC1 p1           | 701.7318+++  | 702,0661+++  | 702,4004+++  |
| KLETAVNLAWTAGNSNTR                       | VDAC1 p2           | 649.3412+++  | 649,6755+++  | 650,0097+++  |
| KacIGLFGGAGVGK                           | ATPB<br>Ac-Lys201  | 573.3375++   | 573,8390++   | 574,3403++   |
| AHGGYSVFAGVGER                           | ATPB p1            | 703.8442++   | 704,3456++   | 704,8470++   |
|                                          |                    | 469.5652+++  | 469,8995+++  | 470,2337+++  |
| FTQAGSEVSALLGR                           | ATPB p2            | 718.3806++   | 718,8821++   | 719,3834++   |
| LVLEVAQHLGESTVR                          | ATPB p3            | 825.9623++   | 826,4637++   | 826,9651++   |
|                                          |                    | 550.9773+++  | 551,3116+++  | 551,6458+++  |
| VLDSGAPIKIPVGPETLGR                      | ATPB p4            | 640.3702+++  | 640,7045+++  | 641,0388+++  |
| ISGASEKacDIVHSGLAYTMoxER                 | GDH<br>Ac-Lys503   | 1111.5415++  | 1112.0430++  | 1112.5441++  |
|                                          |                    | 741.3634+++  | 741.6977+++  | 742.0318+++  |
| ISGASEKDIVHSGLAYTMoxER                   | GDH<br>Lys503      | 1090.5362++  | 1091.0377++  | 1091.5388++  |
|                                          |                    | 727.3599+++  | 727.6942+++  | 728.0283+++  |
|                                          |                    | 545.7718++++ | 546.0225++++ | 546.2730++++ |
| AGVKacINPK                               | GDH<br>Ac- Lys187  | 434.7662++   | 435.2676++   | 435.7689++   |
| GASIVEDKacLVEDLKTR                       | GDH<br>Ac- Lys84   | 907.9965++   | 908.4980++   | 908.9994++   |
|                                          |                    | 605.6668+++  | 606.0011+++  | 606.3353+++  |
| GASIVEDKLVEDLKTR                         | GDH<br>Lys84       | 591.6633+++  | 591.9976+++  | 592.3318+++  |
|                                          |                    | 443.9993++++ | 444.2500++++ | 444.5007++++ |
| DDGSWEVIEGYR                             | GDH p1             | 713.3177++   | 713.8192++   | 714.3205++   |
| DSNYHLLMoxSVQESLER                       | GDH p2             | 968.9571++   | 969.4585++   | 969.9595++   |
|                                          |                    | 646.3072+++  | 646.6414+++  | 646.9754+++  |
| AALKacDQLIVNLLK                          | LDHA<br>Ac- Lys5   | 740.9585++   | 741.4600++   | 741.9614++   |
| VTLTPDEEAR                               | LDHA p1            | 565.7880++   | 566.2895++   | 566.7908++   |
| LVIITAGAR                                | LDHA p2            | 457.2951++   | 457.7965++   | 458.2979++   |
| LSGLPKacHRVIGSGCcamNdaLD<br>SAR          | LDHB<br>Ac-Lys156  | 727.3795+++  | 727.7138+++  | 728.0478+++  |

|                        |                   |                            |                            |                            |
|------------------------|-------------------|----------------------------|----------------------------|----------------------------|
| LSGLPK                 | LDHB<br>Lys156    | 307.6972++                 | 308.1987++                 | 308.7000++                 |
| MoxDKacNELVQK          | 1433Z<br>Ac- Lys3 | 581.7923++                 | 582.2937++                 | 582.7942++                 |
| FLIPNASQPESK           | 1433Z p1          | 665.8537++                 | 666.3552++                 | 666.8565++                 |
| SVTEQGAELSNEER         | 1433Z p2          | 774.8604++                 | 775.3619++                 | 775.8632++                 |
| VVSSIEQKTEGAEK         | 1433Z p3          | 502.2666+++                | 502.6009+++                | 502.9352+++                |
| FNSANEDNVTQVR          | CATA p1           | 747.3526++                 | 747.8540++                 | 748.3553++                 |
| FQGTQPEPR              | THTM p1           | 530.2645++                 | 530.7660++                 | 531.2673++                 |
| AQPEHVISQGR            | THTM p2           | 611.3204++<br>407.8827+++  | 611.8218++<br>408.2169+++  | 612.3230++<br>408.5511+++  |
| LGAVDESLSEETQK         | ERO1A p1          | 753.3701++                 | 753.8716++                 | 754.3729++                 |
| HLLQNVH                | ERO1A p2          | 430.7405++<br>287.4961+++  | 431.2419++<br>287.8303+++  | 431.7432++<br>288.1645+++  |
| VDATEESDLAQQYGVR       | PDIA1 p1          | 890.9210++                 | 891.4225++                 | 891.9238++                 |
| NNFEGETK               | PDIA1 p2          | 526.2564++                 | 526.7578++                 | 527.2591++                 |
| YKPESDELTAEK           | PDIA1 p3          | 705.3434++<br>470.5647+++  | 705.8449++<br>470.8990+++  | 706.3462++<br>471.2332+++  |
| DLFSDGHSEFLK           | PDIA3 p1          | 697.8330++<br>465.5577+++  | 698.3345++<br>465.8921+++  | 698.8358++<br>466.2263+++  |
| IFRDGEEAGAYDGPR        | PDIA3 p2          | 826.8868++<br>551.5936+++  | 827.3882++<br>551.9279+++  | 827.8896++<br>552.2621+++  |
| LAPEYEEAATR            | PDIA3 p3          | 596.3039++                 | 596.8053++                 | 597.3066++                 |
| LAAVDATVNQVLASR        | PDIA6 p1          | 764.4281++                 | 764.9295++                 | 765.4309++                 |
| GSTAPVGGGSFPNITPR      | PDIA6 p2          | 807.9154++                 | 808.4168++                 | 808.9181++                 |
| GESPVDYDGGR            | PDIA6 p3          | 576.2518++                 | 576.7532++                 | 577.2545++                 |
| LGIQTDDKGHILVDEFQNTNVK | GSHR p1           | 1242.6401++<br>828.7625+++ | 1243.1415++<br>829.0968+++ | 1243.6429++<br>829.4310+++ |
| ALLTPVAIAAGR           | GSHR p2           | 576.8586++                 | 577.3600++                 | 577.8614++                 |
| IEQIEAGTPGR            | TRXR1 p1          | 585.8093++                 | 586.3107++                 | 586.8120++                 |
| TIGLETVGVK             | TXNR1 p2          | 508.8030++                 | 509.3044++                 | 509.8058++                 |
| IKQHLENDPGSNEDTDIPK    | TXNL1 p1          | 1075.5216++<br>717.3502+++ | 1076.0231++<br>717.6845+++ | 1076.5244++<br>718.0187+++ |
| VRIDQYQGADAVGLEEK      | TXNL1 p2          | 945.9814++<br>630.9900+++  | 946.4829++<br>631.3243+++  | 946.9842++<br>631.6586+++  |
| QHLENDPGSNEDTDIPK      | TXNL1 p3          | 954.9321++<br>636.9572+++  | 955.4336++<br>637.2915+++  | 955.9349++<br>637.6257+++  |

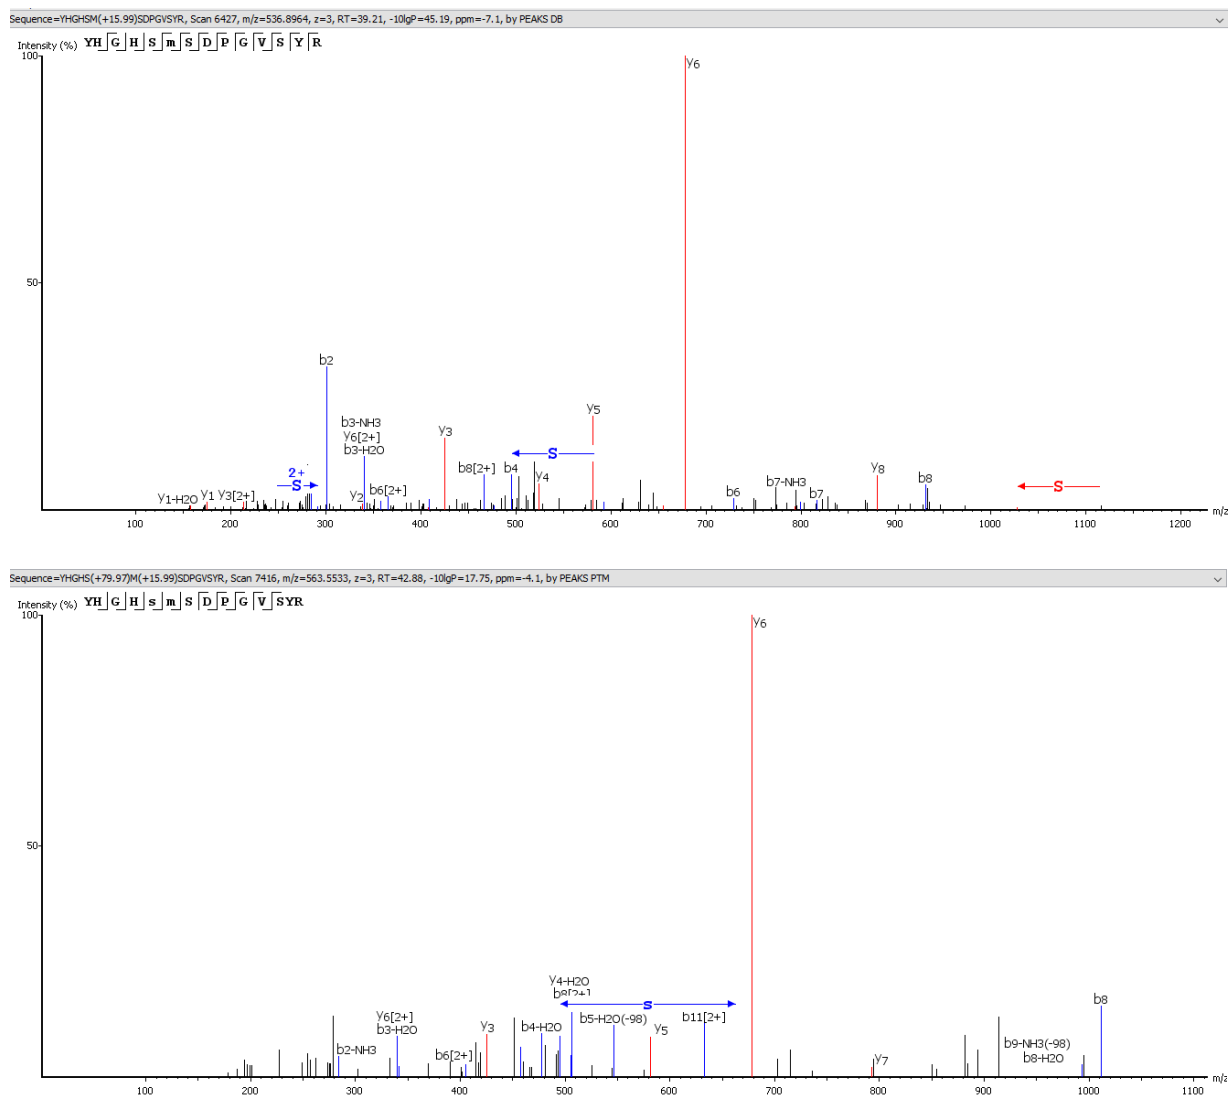

**Supplementary Figure S1. Representative MS/MS spectra of the PDHA1 peptides containing dephosphorylated and phosphorylated Ser293 in the rat cerebral cortex homogenates.** The sequence and parameters of the peptides are shown on the graphs. The images of the spectra were prepared in PEAKS Studio 8.0. The blue and red arrows represent the parts of the spectra, corresponding to the phosphorylatable Ser293 residue.

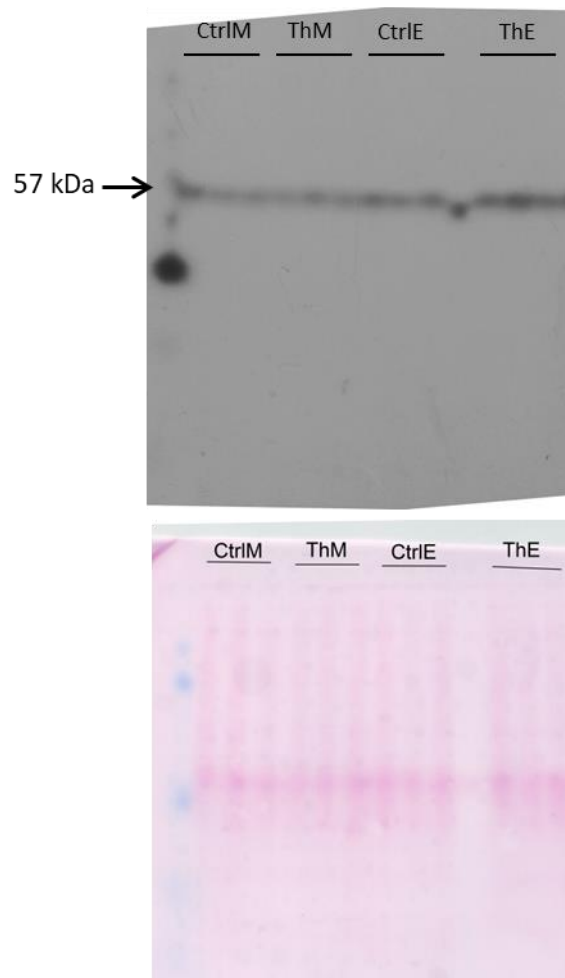

**Supplementary Figure S2. Representative images of western blots for acetylated lysine residues with corresponding Ponceau S staining.** Each of the lanes represents different animals from the following groups: CtrlM – control, morning (n=3); ThM – thiamine, morning (n=3); CtrlE – control, evening (n=3); ThE – thiamine, evening (n=3).

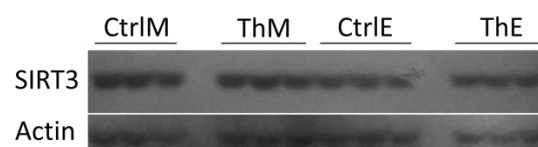

**Supplementary Figure S3. Representative images of western blots for SIRT3 and Actin.** Each lane correspond to different animals from the following groups: CtrlM – control, morning (n=3); ThM – thiamine, morning (n=3); CtrlE – control, evening (n=3); ThE – thiamine, evening (n=3).
